# Supplementary material
Source: publisher figshare collection journal article supplement (https://karger.figshare.com/ndownloader/files/12744713)
Supplement: Supplementary file 1 [file 12744713]

## Simple Mini-Mental State Examination (MMSE)

Name:

Date:

Total score:

| Questions               |                                          | Score |   |   |   |   |   |
|-------------------------|------------------------------------------|-------|---|---|---|---|---|
| Orientation             | 1. Orientation to time:                  | 5     | 4 | 3 | 2 | 1 | 0 |
|                         | What day is today?                       |       |   |   |   |   |   |
|                         | What's the date today?                   |       |   |   |   |   |   |
|                         | What month is this?                      |       |   |   |   |   |   |
|                         | What season is it now?                   |       |   |   |   |   |   |
|                         | What year is it?                         |       |   |   |   |   |   |
|                         | 2. Orientation to place:                 | 5     | 4 | 3 | 2 | 1 | 0 |
|                         | Which province do you live in?           |       |   |   |   |   |   |
|                         | Which district/county do you live in?    |       |   |   |   |   |   |
|                         | Which province do you live in?           |       |   |   |   |   |   |
| Registration            | 3. Please remember and repeat them:      |       |   |   |   | 1 | 0 |
|                         | Ball                                     |       |   |   |   |   |   |
|                         | National flag                            |       |   |   |   |   |   |
|                         | Trees                                    |       |   |   |   |   |   |
| Attention & calculation | 4. Serial sevens                         | 5     | 4 | 3 | 2 | 1 | 0 |
|                         | 100-7-7-7-7-7=?                          |       |   |   |   |   |   |
| Recall                  | 5. Registration recall                   |       |   |   |   | 1 | 0 |
|                         | Ball                                     |       |   |   |   |   |   |
|                         | National flag                            |       |   |   |   |   |   |
|                         | Trees                                    |       |   |   |   |   |   |
| Language                | 6. Naming a pencil and a watch           |       |   |   |   | 1 | 0 |
|                         | Pencil                                   |       |   |   |   |   |   |
|                         | Watch                                    |       |   |   |   |   |   |
| Repetition              | 7. Forty-four stone lions                |       |   |   |   | 1 | 0 |
| Complex commands        | 8. Please do according to my instruction |       |   |   |   | 1 | 0 |
|                         | Please take the paper in the right hand  |       |   |   |   |   |   |
|                         | To fold two sides                        |       |   |   |   |   |   |
|                         | To put it on the thigh                   |       |   |   |   |   |   |
| Reading                 | 9. Please do as you read.                |       |   |   |   | 1 | 0 |
|                         | Please close your eyes                   |       |   |   |   |   |   |
